# Supplementary material for: Enhancement of β-Alanine Biosynthesis in Escherichia coli Based on Multivariate Modular Metabolic Engineering
Source: MDPI journal article supplement (doi:10.3390/biology10101017), 2021-10-09
Supplement: s1 [file s1]

**Table S1. Primers used in this study.**

| Primers         | Sequence (5'-3') restriction <i>italic/underlined</i> | Purpose                       |
|-----------------|-------------------------------------------------------|-------------------------------|
|                 | TGAGCTAACTCACATTAATTGCGTTGCGC                         |                               |
| <i>lacI</i> -F1 | TCACTGCCCCGCTTTCCAGTCGGTGTAGGC                        | $\Delta lacI$                 |
|                 | TGGAGCTGCTTC                                          |                               |
|                 | GTATGGCATGATAGCGCCCGGAAGAGAG                          |                               |
| <i>lacI</i> -R1 | TCAATTCAGGGTGGTGAATGTGATTCCGG                         | $\Delta lacI$                 |
|                 | GGATCCGTCGACC                                         |                               |
|                 | AGAATATTGCCTCTGCCCCGCCAGAAAAA                         |                               |
| <i>iclR</i> -F  | GTCAGCGCATTCACCGTACGCGTGTAGG                          | $\Delta iclR$                 |
|                 | CTGGAGCTGCTTC                                         |                               |
|                 | CAATAAAAATGAAAATGATTTCCACGAT                          |                               |
| <i>iclR</i> -R  | ACAGAAAAAAGAGACTGTCATGATTCCG                          | $\Delta iclR$                 |
|                 | GGGATCCGTCGACC                                        |                               |
|                 | ATTCCACGGCTGCACCTGTATGTTGCAGA                         |                               |
| <i>fumC</i> -F  | TTAACGCCCCGGCTTTCATACTGTGTAGGC                        | $\Delta fumA$ , $\Delta fumC$ |
|                 | TGGAGCTGCTTC                                          |                               |
|                 | AACACCCGCCCAGAGCATAACCAAACCA                          |                               |
| <i>fumA</i> -R  | GGCAGTAAGTGAGAGAACAATGATTCCG                          | $\Delta fumA$ , $\Delta fumC$ |
|                 | GGGATCCGTCGACC                                        |                               |
| <i>lacI</i> -F2 | AGCGTCGAGATCCCGGATCTCGACCGAT                          | pET24a, $\Delta lacI$         |
|                 | GCCCTTGA                                              |                               |
| <i>lacI</i> -R2 | GCATCGGTCGAGATCCGGGATCTCGACG                          | pET24a, $\Delta lacI$         |
|                 | CTCTCC                                                |                               |
| <i>pL</i> -F1   | TGGTATTTATGTCAAATTTGCGGGGATCG                         | pET24a, T7::pL                |
|                 | AGATCTC                                               |                               |
|                 | TCGATCCCGCGAAATTTGACATAAATACC                         |                               |
| <i>pL</i> -R1   | ACTGGCGGTGATACTGAGCACATCACCTC                         | pET24a, T7::pL                |
|                 | TAGAAATAATTTTGTTTAACTTTAAGAAG                         |                               |

|                                    |                                                          |                                        |
|------------------------------------|----------------------------------------------------------|----------------------------------------|
|                                    | GAG                                                      |                                        |
| <i>CgpanD</i> -F1                  | CGCAGCATATGTATATCTCCTTCTTAAAG<br>TTAAACAAAATTATTTCTAGAGG | pET24a-<br><i>CgpanD</i>               |
| <i>CgpanD</i> -R1                  | AGCCGCAGCATCTAATGAGATCCGGCTG<br>CTAACAAAG                | pET24a-<br><i>CgpanD</i>               |
| <i>CgpanD</i> -F2                  | ACTTTAAGAAGGAGATATACATATGCTGC<br>GCACCATTCTGG            | pET24a-<br><i>CgpanD</i>               |
| <i>CgpanD</i> -R2                  | AGCAGCCGGATCTCATTAGATGCTGCGGC<br>TGGTCAG                 | pET24a-<br><i>CgpanD</i>               |
| <i>aspA</i> -F1                    | TTTGACATATGTATATCTCCTTCTTAAAGT<br>TAAACAAAATTATTTCTAGAGG | pET24a- <i>aspA</i>                    |
| <i>aspA</i> -R1                    | GAAAGCGAACAGTAATGAGATCCGGCTG<br>CTAACAAAG                | pET24a- <i>aspA</i>                    |
| <i>aspA</i> -F2                    | ACTTTAAGAAGGAGATATACATATGTCA<br>AACAACATTCGTATCGAAGA     | pET24a- <i>aspA</i>                    |
| <i>aspA</i> -R2                    | AGCAGCCGGATCTCATTACTGTTCGCTTT<br>CATCAGTATAGCG           | pET24a- <i>aspA</i>                    |
| <i>CgpanD</i> -<br><i>aspA</i> -F1 | CGATCCTCTACGCCGGTGGGTATGGTGGC<br>AGGCC                   | pET24a-<br><i>CgpanD</i> - <i>aspA</i> |
| <i>CgpanD</i> -<br><i>aspA</i> -R1 | AACTATATCCGGATTGCCGAAACAAGCG<br>CTCATGAG                 | pET24a-<br><i>CgpanD</i> - <i>aspA</i> |
| <i>CgpanD</i> -<br><i>aspA</i> -F2 | TGCCACCATACCCACCGGCGTAGAGGAT<br>CGAGATCT                 | pET24a-<br><i>CgpanD</i> - <i>aspA</i> |
| <i>CgpanD</i> -<br><i>aspA</i> -R2 | AGCGCTTGTTTCGGCAATCCGGATATAGT<br>TCCTCCTTTCAG            | pET24a-<br><i>CgpanD</i> - <i>aspA</i> |
| <i>TcpanD</i> -F1                  | GCCGGCATATGTATATCTCCTTCTTAAAG<br>TTAAACAAAATTATTTCTAGAGG | pET24a-<br><i>TcpanD</i>               |
| <i>TcpanD</i> -R1                  | GGTTCTGACCTGTAATGAGATCCGGCTGC<br>TAACAAAG                | pET24a-<br><i>TcpanD</i>               |

|                                    |                                                               |                               |
|------------------------------------|---------------------------------------------------------------|-------------------------------|
| <i>TcpanD</i> -F2                  | ACTTTAAGAAGGAGATATACATATGCCG<br>GCTACCGGTGAAGAC               | pET24a-<br><i>TcpanD</i>      |
| <i>TcpanD</i> -R2                  | AGCAGCCGGATCTCATTACAGGTCAGAA<br>CCCAGACGTTCG                  | pET24a-<br><i>TcpanD</i>      |
| <i>TcpanD</i> -<br><i>aspA</i> -F1 | CGATCCTCTACGCCGGTGGGTATGGTGGC<br>AGGCC                        | pET24a-<br><i>TcpanD-aspA</i> |
| <i>TcpanD</i> -<br><i>aspA</i> -R1 | AACTATATCCGGATTGCCGAAACAAGCG<br>CTCATGAG                      | pET24a-<br><i>TcpanD-aspA</i> |
| <i>TcpanD</i> -<br><i>aspA</i> -F2 | TGCCACCATACCCACCGGCGTAGAGGAT<br>CGAGATCT                      | pET24a-<br><i>TcpanD-aspA</i> |
| <i>TcpanD</i> -<br><i>aspA</i> -R2 | AGCGCTTGTTTCGGCAATCCGGATATAGT<br>TCCTCCTTTCAG                 | pET24a-<br><i>TcpanD-aspA</i> |
| <i>ppc</i> -F1                     | TCGTTTCATATGTATATCTCCTTCTTAAAGT<br>TAAACAAAATTATTTCTAGAGG     | pET24a- <i>ppc</i>            |
| <i>ppc</i> -R1                     | CGTAATACCGGCTAATGAGATCCGGCTGC<br>TAACAAAG                     | pET24a- <i>ppc</i>            |
| <i>ppc</i> -F2                     | ACTTTAAGAAGGAGATATACATATGAAC<br>GAACAATATTCCGCATT             | pET24a- <i>ppc</i>            |
| <i>ppc</i> -R2                     | AGCAGCCGGATCTCATTAGCCGGTATTAC<br>GCATACCTG<br>CGGTCCATATGTATA | pET24a- <i>ppc</i>            |
| <i>gldA</i> -F1                    | TCTCCTTCTTAAAGTTAAACAAAATTATT<br>TCTAGAGG                     | pET24a- <i>gldA</i>           |
| <i>gldA</i> -R1                    | CAAGAGTGGGAATAATGAGATCCGGCTG<br>CTAACAAAG                     | pET24a- <i>gldA</i>           |
| <i>gldA</i> -F2                    | ACTTTAAGAAGGAGATATACATATGGAC<br>CGCATTATTCAATCACC             | pET24a- <i>gldA</i>           |
| <i>gldA</i> -R2                    | AGCAGCCGGATCTCATTATTCCCACTCTT<br>GCAGGAAACG                   | pET24a- <i>gldA</i>           |

|                   |                                                          |                          |
|-------------------|----------------------------------------------------------|--------------------------|
| <i>dhaKLM</i> -F1 | TTTTTCATATGTATATCTCCTTCTTAAAGT<br>TAAACAAAATTATTTCTAGAGG | pET24a-<br><i>dhaKLM</i> |
| <i>dhaKLM</i> -R1 | AACCGTCAGGGTTAATGAGATCCGGCTG<br>CTAACAAAG                | pET24a-<br><i>dhaKLM</i> |
| <i>dhaKLM</i> -F2 | ACTTTAAGAAGGAGATATACATATGAAA<br>AAATTGATCAATGATGTGCA     | pET24a-<br><i>dhaKLM</i> |
| <i>dhaKLM</i> -R2 | AGCAGCCGGATCTCATTAACCCTGACGGT<br>TGAAACGTT               | pET24a-<br><i>dhaKLM</i> |
| <i>ampr</i> -F1   | ATTAAGCATTGGTAATGTCTAACAATTCG<br>TTCAAGCCG               | pCDF, <i>ampr</i>        |
| <i>ampr</i> -R1   | ATGTTGAATACTCATACTCTTCCTTTTTCA<br>ATATTATTGAAGCATTT      | pCDF, <i>ampr</i>        |
| <i>ampr</i> -F2   | ACGAATTGTTAGACATTACCAATGCTTAA<br>TCAGTGAGGC              | pCDF, <i>ampr</i>        |
| <i>ampr</i> -R2   | TGAAAAAGGAAGAGTATGAGTATTCAAC<br>ATTTCCGTGTCG             | pCDF, <i>ampr</i>        |
| <i>lacI</i> -F3   | AGAGCGTCGAGATCCCAGTGAGCGCAAC<br>GCAATTAAT                | pCDF, $\Delta lacI$      |
| <i>lacI</i> -R3   | GCGTTGCGCTCACTGGGATCTCGACGCTC<br>TCCCTTATG               | pCDF, $\Delta lacI$      |
| <i>ppc</i> -F3    | TGGTATTTATGTCAATCACTCATTAGGCA<br>CCGGGA                  | pCDF- <i>ppc</i>         |
| <i>ppc</i> -R3    | TTGAGGGGTTTTTTGGCTAACTTACATTA<br>ATTGCGTTGCG             | pCDF- <i>ppc</i>         |
| <i>ppc</i> -F4    | GTGCCTAATGAGTGATTGACATAAATACC<br>ACTGGCGGT               | pCDF- <i>ppc</i>         |
| <i>ppc</i> -R4    | TTAATGTAAGTTAGCCAAAAAACCCTCA<br>AGACCCG                  | pCDF- <i>ppc</i>         |
| <i>gldA</i> -F3   | TGGTATTTATGTCAATCACTCATTAGGCA                            | pCDF- <i>gldA</i>        |

|                                        |                                              |                                          |
|----------------------------------------|----------------------------------------------|------------------------------------------|
|                                        | CCGGGA                                       |                                          |
| <i>gldA</i> -R3                        | TTGAGGGGTTTTTTGGCTAACTTACATTA<br>ATTGCGTTGCG | pCDF- <i>gldA</i>                        |
| <i>gldA</i> -F4                        | GTGCCTAATGAGTGATTGACATAAATACC<br>ACTGGCGGT   | pCDF- <i>gldA</i>                        |
| <i>gldA</i> -R4                        | TTAATGTAAGTTAGCCAAAAAACCCTCA<br>AGACCCG      | pCDF- <i>gldA</i>                        |
| <i>ppc-gldA</i> -<br><i>dhaKLM</i> -F1 | TGGTATTTATGTCAACCAGTGAGCGCAAC<br>GCATAAG     | pCDF- <i>ppc</i> -<br><i>gldA-dhaKLM</i> |
| <i>ppc-gldA</i> -<br><i>dhaKLM</i> -R1 | TTCAACCGTCAGGGTTAATTAACCTAGGC<br>TGCTGCCACC  | pCDF- <i>ppc</i> -<br><i>gldA-dhaKLM</i> |
| <i>ppc-gldA</i> -<br><i>dhaKLM</i> -F2 | CGTTGCGCTCACTGGTTGACATAAATACC<br>ACTGGCG     | pCDF- <i>ppc</i> -<br><i>gldA-dhaKLM</i> |
| <i>ppc-gldA</i> -<br><i>dhaKLM</i> -R2 | ATCGCCGACATCACCGGATATAGTTCCTC<br>CTTTCAGC    | pCDF- <i>ppc</i> -<br><i>gldA-dhaKLM</i> |
| <i>ppc-gldA</i> -<br><i>dhaKLM</i> -F3 | GGAGGAACTATATCCGGTGATGTCGGCG<br>ATATAGGC     | pCDF- <i>ppc</i> -<br><i>gldA-dhaKLM</i> |
| <i>ppc-gldA</i> -<br><i>dhaKLM</i> -R3 | AGCCTAGGTTAATTAACCCTGACGGTTGA<br>AACGTTG     | pCDF- <i>ppc</i> -<br><i>gldA-dhaKLM</i> |

---
